# Supplementary material for: Cu(ii) immobilized on Fe3O4@HNTs–tetrazole (CFHT) nanocomposite: synthesis, characterization, investigation of its catalytic role for the 1,3 dipolar cycloaddition reaction, and antibacterial activity
Source: Royal Society of Chemistry journal article supplement (doi:10.1039/d0ra04772d), 2020-01-01
Supplement: d0ra04772d1.pdf [file d0ra04772d1.pdf]

**Cu(II) immobilized on Fe<sub>3</sub>O<sub>4</sub>@HNTs-tetrazole (CFHT) nanocomposite:  
Synthesis, characterization, investigation of its catalytic role for the 1,3  
dipolar cycloaddition reaction, and antibacterial activity**

Zoleikha Hajizadeh, Fereshhte Hassanzadeh-Afruzi, Diana Fallah Jelodar, Mohammad Reza  
Ahghari, Ali Maleki\*

*Catalysts and Organic Synthesis Research Laboratory, Department of Chemistry, Iran University of  
Science and Technology, Tehran 16846-13114, Iran*

*\*Corresponding author E-mail: maleki@iust.ac.ir; Fax: +98-21-73021584; Tel: +98-21-73228313*

---

**Table of contents**

---

| <b>Subject</b>                                                                | <b>Page</b> |
|-------------------------------------------------------------------------------|-------------|
| <b>Figure S1.</b> <sup>1</sup> H NMR spectrum of the product <b>4i</b> .....  | S2          |
| <b>Figure S2.</b> <sup>13</sup> C NMR spectrum of the product <b>4i</b> ..... | S3          |

---

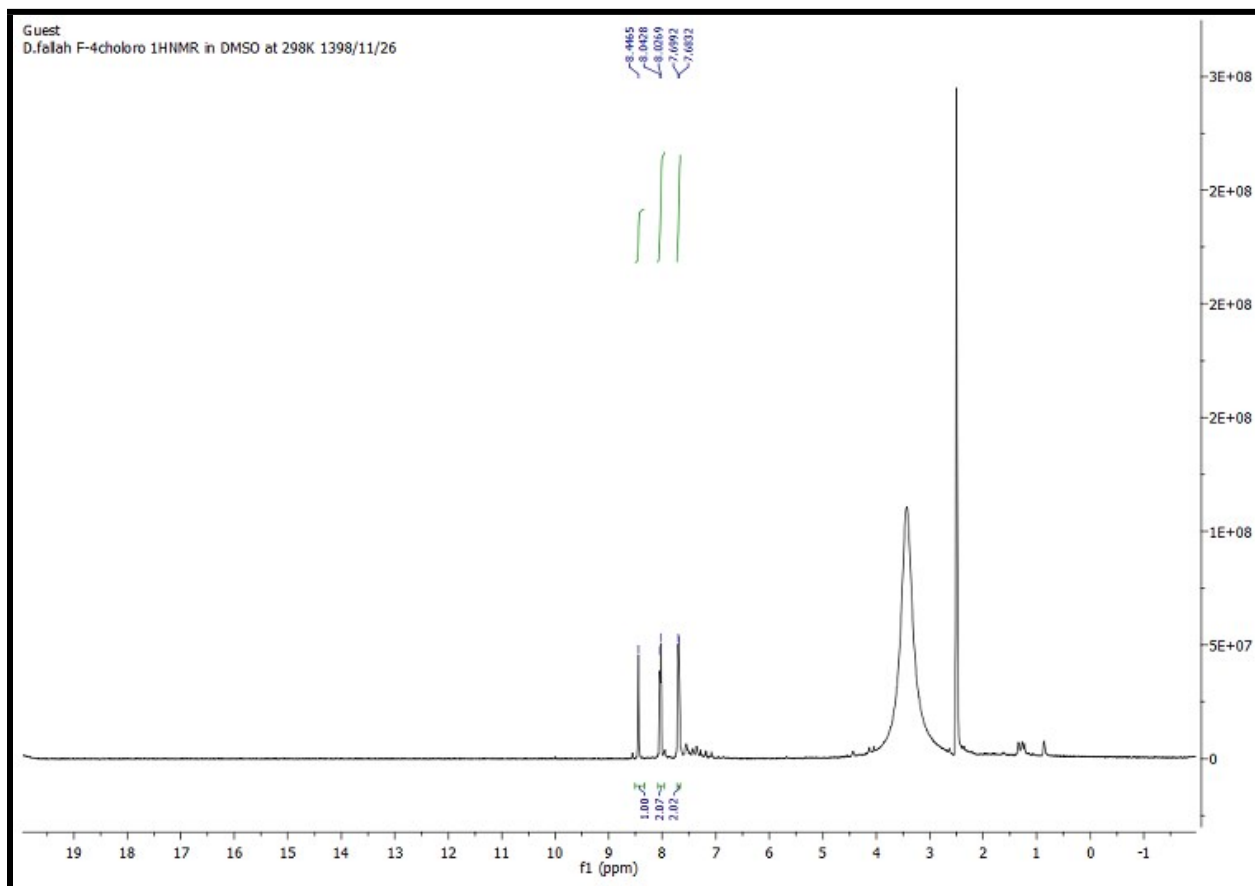

**Figure S1.**  $^1\text{H}$  NMR spectrum of the product **4i**.

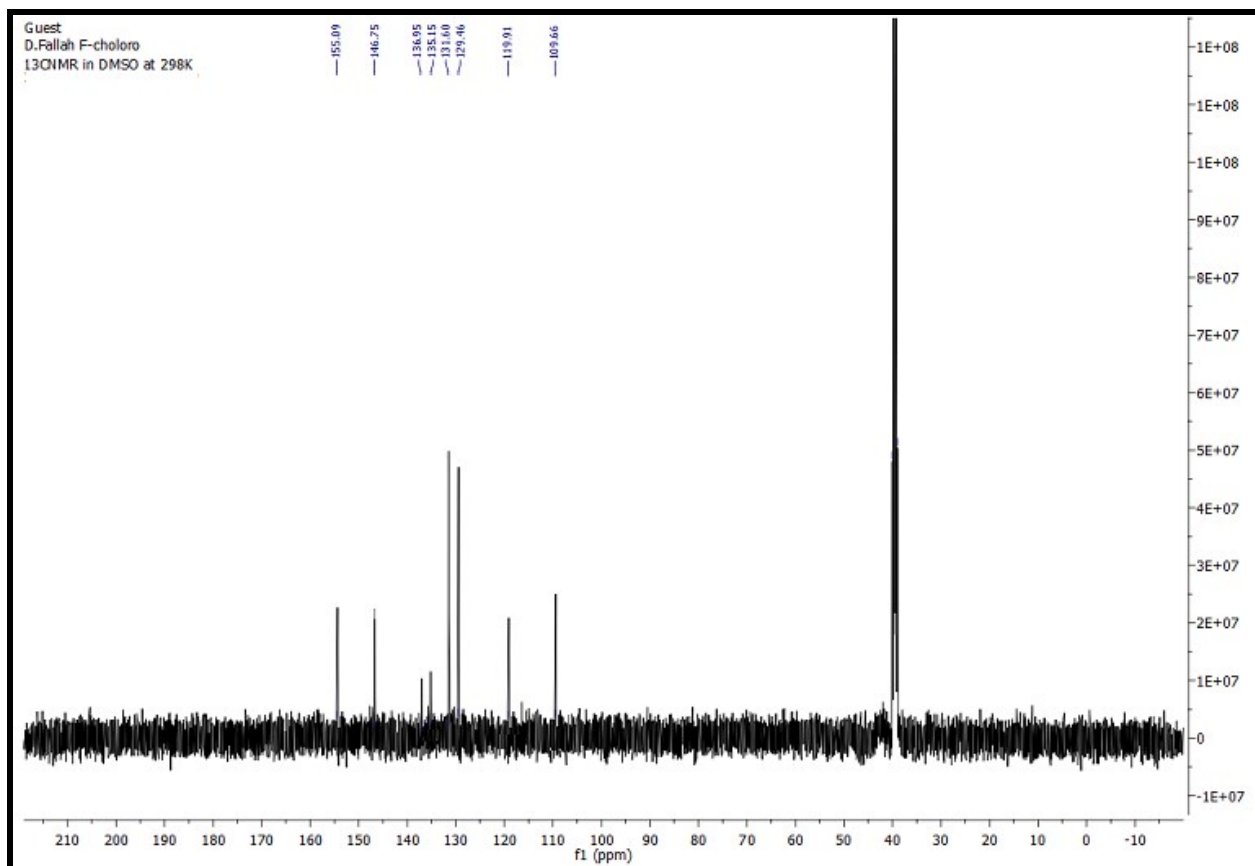

**Figure S2.**  $^{13}\text{C}$  NMR spectrum of the product **4i**.
